# Supplementary material for: CYK-4 functions independently of its centralspindlin partner ZEN-4 to cellularize oocytes in germline syncytia
Source: eLife. 2018 Jul 10;7:e36919. doi: 10.7554/eLife.36919 (PMC6056237; doi:10.7554/eLife.36919)
Supplement: Figure 1—figure supplement 1—source data 1. [file elife-36919-fig1-figsupp1-data1.xlsx]

## Sheet: CYK-4-mNG Lethality
Embryonic viability 24–48 hours after dsRNA injection
N2 without RNAi
	Total emb.	Hatched emb.	% Viability
Plate 1	138	138	100
Plate 2	154	154	100
Plate 3	144	144	100
Plate 4	140	140	100
Mean Via.			100
SD Via.			0
n	576
N2 with cyk-4(RNAi)
	Total emb.	Hatched emb.	% Viability
Plate 1	60	0	0
Plate 2	26	0	0
Plate 3	57	0	0
Plate 4	21	0	0
Mean Via.			0
SD Via.			0
n	164
cyk-4::mNeonGreen with cyk-4(RNAi)
	Total	Hatched	% Viability
Plate 1	98	95	96.9388
Plate 2	120	98	81.6667
Plate 3	113	86	76.1062
Plate 4	126	121	96.0317
Plate 5	111	93	83.7838
Plate 6	69	67	97.1014
Mean Via.			88.6048
SD Via.			9.21306
n	637
