# Supplementary material for: CYK-4 functions independently of its centralspindlin partner ZEN-4 to cellularize oocytes in germline syncytia
Source: eLife. 2018 Jul 10;7:e36919. doi: 10.7554/eLife.36919 (PMC6056237; doi:10.7554/eLife.36919)
Supplement: Figure 1—source data 1. [file elife-36919-fig1-data1.xlsx]

## Sheet: CYK-4 NG Measurements
Rachis bridge diameter measurement
	Pachytene			Loop				Oocyte Cellularization
File name	Pachytene cell	Distal	Proximal	Loop 1	Loop 2	Loop 3	Loop 4	Oocyte 1	Oocyte 2	Oocyte 3	Oocyte 4	Oocyte 5
SG011	1	14.02	5.83	6.4	8.36	10.97	14.29	13.7	14.76	3.9	0	0
	2	12.87	5.618
	3	11.649	6.005
	4	13.558	5.154
	5		8.764
	6		6.255
File name	Pachytene cell	Distal	Proximal	Loop 1	Loop 2	Loop 3	Loop 4	Oocyte 1	Oocyte 2	Oocyte 3	Oocyte 4	Oocyte 5
SG0110	1	10.998	5.056	9.69	12.068	12.5	10.124	13.643	14.426	14.349	0	0
	2	11.511	5.523
	3	10.9	4.902
	4	10.25	5.757
	5		4.738
	6		5.217
File name	Pachytene cell	Distal	Proximal	Loop 1	Loop 2	Loop 3	Loop 4	Oocyte 1	Oocyte 2	Oocyte 3	Oocyte 4	Oocyte 5
SG0111	1	9.674	5.59		8.143	11.971	16.45	13.101	12.068	3.953	0	0
	2	13.251	6.274
	3	11.959	8.043
	4	11.756	7.167
	5		5.833
	6		7
File name	Pachytene cell	Distal	Proximal	Loop 1	Loop 2	Loop 3	Loop 4	Oocyte 1	Oocyte 2	Oocyte 3	Oocyte 4	Oocyte 5
SG0118	1	11.787	6.403	11.096	11.04	10.198	13.068	20.011	21.769	6.741	0	0
	2	9.333	6.052
	3	10.366	6.671
	4	11.277	4.61
	5		7.591
	6		5.668
File name	Pachytene cell	Distal	Proximal	Loop 1	Loop 2	Loop 3	Loop 4	Oocyte 1	Oocyte 2	Oocyte 3	Oocyte 4	Oocyte 5
SG0125	1	11.145	6.875			11.711	10.957	12.25	20.718	8.604	0	0
	2	10.607	6.625
	3	10.505	6.2
	4	10.832	6.039
	5		5.191
	6		6.637
File name	Pachytene cell	Distal	Proximal	Loop 1	Loop 2	Loop 3	Loop 4	Oocyte 1	Oocyte 2	Oocyte 3	Oocyte 4	Oocyte 5
SG0139	1	10.523	7.521	17.252	15.735	14.714	15.436	22.875	9.405	3.659	0	0
	2	9.22	6.768
	3	10.217	6.63
	4		5.376
	5		7.601
	6		6.637
File name	Pachytene cell	Distal	Proximal	Loop 1	Loop 2	Loop 3	Loop 4	Oocyte 1	Oocyte 2	Oocyte 3	Oocyte 4	Oocyte 5
SG0145	1	10.626	7.487	16.347	16.035	17.263	18.909	25.725	26.401	10.796	0	0
	2	9.882	6.799
	3	11.501	4.14
	4	11.125	6.169
	5		7.169
	6		7.762
File name	Pachytene cell	Distal	Proximal	Loop 1	Loop 2	Loop 3	Loop 4	Oocyte 1	Oocyte 2	Oocyte 3	Oocyte 4	Oocyte 5
SG0146	1	8.833	6	10.467	14.337	20.798	27.717	21.256	15.696	8.75	0	0
	2	8.168	7.071
	3	10.335	4.931
	4	8.14	6.1
	5		4.5
	6		5.815
File name	Pachytene cell	Distal	Proximal	Loop 1	Loop 2	Loop 3	Loop 4	Oocyte 1	Oocyte 2	Oocyte 3	Oocyte 4	Oocyte 5
SG0153	1	9.434	7.463	8.434	9.869	11.267	17.218	23.502	16.025	8.253	0	0
	2	9.571	7.833
	3	11.973	8.34
	4	10.977	5.5
	5		6.295
	6		6.06
File name	Pachytene cell	Distal	Proximal	Loop 1	Loop 2	Loop 3	Loop 4	Oocyte 1	Oocyte 2	Oocyte 3	Oocyte 4	Oocyte 5
SG0171	1	11.505	7.008	10.073	10.202	11.949	12.85	12.701	16.111	6.368	0	0
	2	12.168	4.717
	3	13.463	7.002
	4		6.176
	5		7.683
	6		6.841
File name	Pachytene cell	Distal	Proximal	Loop 1	Loop 2	Loop 3	Loop 4	Oocyte 1	Oocyte 2	Oocyte 3	Oocyte 4	Oocyte 5
SG0174	1	10.319	5.134	10.124	18.501	20.873	24.255	16.949	14.668	5.099	0	0
	2	13.5	8.117
	3	13.082	7.397
	4		7.319
	5		8.025
	6		7.504
File name	Pachytene cell	Distal	Proximal	Loop 1	Loop 2	Loop 3	Loop 4	Oocyte 1	Oocyte 2	Oocyte 3	Oocyte 4	Oocyte 5
SG0177	1	13.866	8.125	17.861	16.997	13.661	18.63	25.619	32.466	3.889	0	0
	2	11.408	7.53
	3	12.351	6.7
	4	11.227	6.456
	5		6.993
	6		8.044
		Distal	Proximal	Loop 1	Loop 2	Loop 3	Loop 4	Oocyte 1	Oocyte 2	Oocyte 3	Oocyte 4	Oocyte 5
	Average in pixels	11.2605	6.47258	11.2663	12.8443	16.7875	19.9904	22.1332	21.4513	8.4361	0	0
	Average in microns	2.47732	1.42397	2.47859	2.82574	3.69325	4.39789	4.8693	4.71929	1.85594	0	0
	n	45	72	10	11	12	12	12	12	12	12	12
	Std. Dev.	0.323952	0.235838	0.876878	0.807103	0.825083	1.15861	1.17543	1.43308	0.732221	0	0
	Std. Error	0.0482919	0.0277938	0.277293	0.243351	0.238181	0.334461	0.339317	0.413694	0.211374	0	0
