# Supplementary material for: CYK-4 functions independently of its centralspindlin partner ZEN-4 to cellularize oocytes in germline syncytia
Source: eLife. 2018 Jul 10;7:e36919. doi: 10.7554/eLife.36919 (PMC6056237; doi:10.7554/eLife.36919)
Supplement: Figure 2—source data 1. [file elife-36919-fig2-data1.xlsx]

## Sheet: Sheet1
Upshift L1 worms to 25°C for 24 hours, then downshift to 16°C for 24 hours
Single worms and keep at 16°C, 24 hours later, count embryos laid (24–48 hours after downshift)
	Control (OD95)	cyk-4(or749ts) (OD239)
Plate 1	65	58
Plate 2	54	97
Plate 3	71	61
Plate 4	47	67
Plate 5	62	88
Plate 6	60	90
Plate 7	64	81
Plate 8	37	85
Plate 9	59	107
Plate 10	72	106
Plate 11	69	110
Mean	60	86.3636
SD	10.6113	18.31
