# Supplementary material for: CYK-4 functions independently of its centralspindlin partner ZEN-4 to cellularize oocytes in germline syncytia
Source: eLife. 2018 Jul 10;7:e36919. doi: 10.7554/eLife.36919 (PMC6056237; doi:10.7554/eLife.36919)
Supplement: Figure 2—source data 2. [file elife-36919-fig2-data2.xlsx]

## Sheet: Sheet1
Upshift L4 worms to 25°C for 24 hours
Single worms and keep at 25°C, 24 hours later, count embryos laid (24–48 hours after upshift)
	Control (OD95)	cyk-4(or749ts) (OD239)
Plate 1	90	0
Plate 2	94	0
Plate 3	76	0
Plate 4	93	3
Plate 5	77	0
Plate 6	93	0
Plate 7	65	0
Plate 8	73	0
Plate 9	94	6
Plate 10	77	0
Plate 11	89	0
Plate 12	75
Mean	83	0.818182
SD	10.1623	1.94001
