# Supplementary material for: CYK-4 functions independently of its centralspindlin partner ZEN-4 to cellularize oocytes in germline syncytia
Source: eLife. 2018 Jul 10;7:e36919. doi: 10.7554/eLife.36919 (PMC6056237; doi:10.7554/eLife.36919)
Supplement: Figure 3—figure supplement 1—source data 1. [file elife-36919-fig3-figsupp1-data1.xlsx]

## Sheet: Sheet1
Number of worms:					total (n)
	L4	L3	L3-Pathfinding defect	L2-like
Control (OD95)	4	6	0	0	10
cyk-4(t1689ts) (OD241)	1	0	5	4	10
zen-4(or153ts) (JCC754)	2	0	4	5	11
In percentage:
	L4	L3	L3-Pathfinding defect	L2-like
Control (OD95)	40	60	0	0
cyk-4(t1689ts) (OD241)	10	0	50	40
zen-4(or153ts) (JCC754)	18.1818	0	36.3636	45.4545
