# Supplementary material for: CYK-4 functions independently of its centralspindlin partner ZEN-4 to cellularize oocytes in germline syncytia
Source: eLife. 2018 Jul 10;7:e36919. doi: 10.7554/eLife.36919 (PMC6056237; doi:10.7554/eLife.36919)
Supplement: Figure 3—figure supplement 1—source data 2. [file elife-36919-fig3-figsupp1-data2.xlsx]

## Sheet: Sheet1
Upshift L1 worms to 25°C for 24 hours, then downshift to 16°C for 24 hours
Single worms and keep at 16°C, 24 hours later, count embryos laid (24–48 hours after downshift)
Control (OD95)	Embryos laid		cyk-4(t1689ts) (OD241)	Embryos laid		zen-4(or153ts) (JCC754)	Embryos laid
Plate 1	65		Plate 1	0		Plate 1	0
Plate 2	54		Plate 2	0		Plate 2	0
Plate 3	71		Plate 3	0		Plate 3	0
Plate 4	47		Plate 4	0		Plate 4	0
Plate 5	62		Plate 5	0		Plate 5	0
Plate 6	60		Plate 6	0		Plate 6	0
Plate 7	64		Plate 7	0		Plate 7	0
Plate 8	37		Plate 8	0		Plate 8	0
Plate 9	59		Plate 9	0		Plate 9	0
Plate 10	72		Plate 10	0		Plate 10	0
Plate 11	69		Plate 11	0		Plate 11	0
			Plate 12	0		Plate 12	0
Mean	60		Mean	0		Mean	0
SD	10.6113		SD	0		SD	0
