# Supplementary material for: CYK-4 functions independently of its centralspindlin partner ZEN-4 to cellularize oocytes in germline syncytia
Source: eLife. 2018 Jul 10;7:e36919. doi: 10.7554/eLife.36919 (PMC6056237; doi:10.7554/eLife.36919)
Supplement: Figure 3—source data 1. [file elife-36919-fig3-data1.xlsx]

## Sheet: Sheet1
Inject N2 L4s with cyk-4 or zen-4 dsRNA
48 h after injection: Single worms
72 h after injection: Remove mothers
48–72 h after injection: Count embryos
Control	Hatched emb.	Dead emb.	Total emb.	% Viability
Plate 1	77	0	77	100
Plate 2	141	1	142	99.2958
Plate 3	101	4	105	96.1905
Plate 4	91	1	92	98.913
Plate 5	62	1	63	98.4127
Plate 6	62	1	63	98.4127
Plate 7	131	0	131	100
Plate 8	103	2	105	98.0952
Plate 9	143	2	145	98.6207
Plate 10	109	4	113	96.4602
		Mean	103.6	98.4401
		SD	30.1301	1.28912
		Total n	1036
cyk-4(RNAi)	Hatched emb.	Dead emb.	Total emb.	% Viability
Plate 1	0	5	5	0
Plate 2	0	3	3	0
Plate 3	0	1	1	0
Plate 4	0	2	2	0
Plate 5	0	5	5	0
Plate 6	0	4	4	0
Plate 7	0	19	19	0
Plate 8	0	2	2	0
Plate 9	0	1	1	0
Plate 10	0	2	2	0
Plate 11	0	7	7	0
Plate 12	0	2	2	0
		Mean	4.41667	0
		SD	4.94439	0
		Total n	53
zen-4(RNAi)	Hatched emb.	Dead emb	Brood	% Viability
Plate 1	0	147	147	0
Plate 2	0	136	136	0
Plate 3	0	108	108	0
Plate 4	0	61	61	0
Plate 5	0	77	77	0
Plate 6	0	106	106	0
Plate 7	0	120	120	0
Plate 8	0	146	146	0
		Mean	112.625	0
		SD	31.3867	0
		Total n	901
