# Supplementary material for: CYK-4 functions independently of its centralspindlin partner ZEN-4 to cellularize oocytes in germline syncytia
Source: eLife. 2018 Jul 10;7:e36919. doi: 10.7554/eLife.36919 (PMC6056237; doi:10.7554/eLife.36919)
Supplement: Figure 3—source data 2. [file elife-36919-fig3-data2.xlsx]

## Sheet: Sheet1
Upshift L4 worms to 25°C, single worms 24 hours later and keep at 25°C, count embryos laid over the next 24 hours (24–48 hours after upshift)
Control (OD95)			cyk-4(t1689ts) (OD241)			zen-4(or153ts) (JCC754)
	Embryos laid			Embryos laid			Embryos laid
Plate 1	90		Plate 1	20		Plate 1	60
Plate 2	94		Plate 2	35		Plate 2	61
Plate 3	76		Plate 3	73		Plate 3	72
Plate 4	93		Plate 4	21		Plate 4	22
Plate 5	77		Plate 5	15		Plate 5	52
Plate 6	93		Plate 6	19		Plate 6	87
Plate 7	65		Plate 7	21		Plate 7	55
Plate 8	73		Plate 8	15		Plate 8	63
Plate 9	94		Plate 9	49		Plate 9	29
Plate 10	77		Plate 10	35		Plate 10	59
Plate 11	89					Plate 11	21
Plate 12	75					Plate 12	51
Mean	83		Mean	30.3		Mean	52.6667
SD	10.1623		SD	18.5356		SD	19.851
