# Supplementary material for: CYK-4 functions independently of its centralspindlin partner ZEN-4 to cellularize oocytes in germline syncytia
Source: eLife. 2018 Jul 10;7:e36919. doi: 10.7554/eLife.36919 (PMC6056237; doi:10.7554/eLife.36919)
Supplement: Figure 4—figure supplement 2—source data 1. [file elife-36919-fig4-figsupp2-data1.xlsx]

## Sheet: summary
BGLI190: Worms grown at 16 until young adult. Half upshifted to 25 and imaged after 5.5-6 hrs, half left at 16 prior to imaging.
Rachis bridge opening measured. 0 refers to apoptotic zone. Position is relative to apop zone- up one side of gonad and down the other
MICRONS
	t1689@16		t1689@25		or749@16		or749@25		OD95@16		OD95@25
	ave	std	ave	std	ave	std	ave	std	ave	std	ave	std
11	3.1203	0.691157	3.666	1.23707	3.49062	0.64337	4.23867	1.00974	3.19925	0.874586	4.0888	0.447643
10	3.3316	0.747806	3.739	0.885776	3.4002	0.585242	4.55535	0.882398	3.62427	0.407655	3.79038	0.586454
9	3.22505	0.756834	3.65751	0.830683	3.42334	0.492178	4.44028	0.896252	3.02471	0.499697	3.7893	0.490541
8	3.15203	0.798278	3.80001	0.741414	3.07144	0.497498	4.60263	0.805462	3.12863	0.576044	3.69667	0.457759
7	3.14628	0.791798	3.57897	0.628128	3.19856	0.618703	4.5331	0.678917	2.76929	0.615454	3.76634	0.301684
6	3.12015	0.984477	3.63176	0.801571	3.20127	0.673883	4.66762	0.858062	2.86211	0.521484	3.84657	0.711412
5	3.2048	0.511448	3.72479	1.13635	2.99721	0.505732	4.4715	0.91871	2.79149	0.644822	3.7111	0.537485
4	3.19582	0.625289	3.38499	0.955126	3.05074	0.702552	4.42248	1.02008	2.78854	0.530548	3.78423	0.615904
3	2.93767	1.00717	3.51975	0.975954	2.92173	0.520019	4.48258	0.840441	2.61419	0.419298	3.56657	0.488046
2	2.78124	0.623878	3.47671	0.733826	3.02143	0.632052	4.27822	1.04172	2.79028	0.618587	3.37254	0.534685
1	2.67036	0.666659	3.3707	0.864946	3.13236	0.721146	4.12314	0.724538	2.63511	0.54711	3.26359	0.535998
0
Summary (positions 0-12)
temp	OD95	t1689	or749
16	3.0 +/- 0.5	3.2 +/- 0.8	3.2 +/- 0.5
25	3.7 +/- 0.5	3.5 +/- 0.8	4.5 +/- 0.8
PIXELS
	t1689@16		t1689@25		or749@16		or749@25		OD95@16		OD95@25
position	ave	std	ave	std	ave	std	ave	std	ave	std	ave	std
12	18.932	5.56126	16.4025	0.392444	17.4944	2.41137	21.2746	3.69492	20		19.2583	3.20308
11	15.6015	3.45578	18.33	6.18537	17.4531	3.21685	21.1933	5.04872	15.9962	4.37293	20.444	2.23821
10	16.658	3.73903	18.695	4.42888	17.001	2.92621	22.7768	4.41199	18.1213	2.03827	18.9519	2.93227
9	16.1252	3.78417	18.2876	4.15342	17.1167	2.46089	22.2014	4.48126	15.1236	2.49848	18.9465	2.45271
8	15.7601	3.99139	19	3.70707	15.3572	2.48749	23.0131	4.02731	15.6431	2.88022	18.4834	2.28879
7	15.7314	3.95899	17.8948	3.14064	15.9928	3.09351	22.6655	3.39458	13.8465	3.07727	18.8317	1.50842
6	15.6008	4.92238	18.1588	4.00785	16.0064	3.36942	23.3381	4.29031	14.3106	2.60742	19.2328	3.55706
5	16.024	2.55724	18.6239	5.68175	14.9861	2.52866	22.3575	4.59355	13.9574	3.22411	18.5555	2.68742
4	15.9791	3.12645	16.9249	4.77563	15.2537	3.51276	22.1124	5.10042	13.9427	2.65274	18.9212	3.07952
3	14.6883	5.03586	17.5988	4.87977	14.6086	2.6001	22.4129	4.20221	13.0709	2.09649	17.8329	2.44023
2	13.9062	3.11939	17.3835	3.66913	15.1071	3.16026	21.3911	5.20859	13.9514	3.09294	16.8627	2.67343
1	13.3518	3.3333	16.8535	4.32473	15.6618	3.60573	20.6157	3.62269	13.1756	2.73555	16.3179	2.67999
0
AVE	15.6965	3.8821	17.8461	4.11222	16.0032	2.94777	22.1127	4.33971	15.0949	2.84331	18.5532	2.6451

## Sheet: or749@25
	2a	2b	2c	2d	2f	2g	2h	2i	2j	2k	2l	2m									2a	2b	2c	2d	2f	2g	2h	2i	2j	2k	2l	2m	2a	2b	2c	2d	2f	2g	2h	2i	2j	2k	2l	2m
			18.756				21.302										*ring canal sizes measured up one side and down the other of the central plane of the rachis- center positiion in this measurement is just distal to the apop zone						18.756				21.302
12	19.821		19.851		21.077		29.067			23.739		23.707		22.877	3.50668					12	19.821		19.851		21.077		29.067			23.739		23.707	17.464		17.678					19.067						21.2746	3.69492
11	23.739		28.532		24.01		25.647			19.686		18.788		23.4003	3.6589					11	23.739		28.532		24.01		25.647			19.686		18.788			18.927		11.102					20.309				21.1933	5.04872
10	21.468	24.739	27.134		16.008		27.817		20.518	19.799		29.155		23.3298	4.59772					10	21.468	24.739	27.134		16.008		27.817		20.518	19.799		29.155	27.366		25.52		19.144		16.667			20.763				22.7768	4.41199
9	22.706	22.804	22.132	26.667	19.602		22.559	22.667	29.732	17.385		24.042		23.0296	3.40101					9	22.706	22.804	22.132	26.667	19.602		22.559	22.667	29.732	17.385		24.042	23.286	18.012	18.554	24.676	12.349		29.963		21.024	16.667		27		22.2014	4.48126
8	22.94	24.676	14.784	27.657	17.734		21.218	26.466	23.707	19.821		27.074		22.6077	4.22409					8	22.94	24.676	14.784	27.657	17.734		21.218	26.466	23.707	19.821		27.074	17.308	23.674	25.08	27.341	19.602		29.59	22.959	24.187	18.196		26.249		23.0131	4.02731
7	20.055	23.627	23.022	22.755	25.456	20.809	21.868	32.277	19.209	16.997		22.091		22.5605	3.95491					7	20.055	23.627	23.022	22.755	25.456	20.809	21.868	32.277	19.209	16.997		22.091	23.219	26.874	24.005	23.286	18.768		24.157	25.751	17.804	20.923		23.022		22.6655	3.39458
6	24.148	21.344	15.133	25.734	28.64	26.907	21.633	25.201	23.537	19.799	23.707	29.614		23.7831	3.98444					6	24.148	21.344	15.133	25.734	28.64	26.907	21.633	25.201	23.537	19.799	23.707	29.614	25.298	22.755	27.166	24.331	18.028	25.239	15.085	23.646	25	15.217		29.614		23.3381	4.29031
5	22.161	17.714	19.105	30.405	24.91	23.431	15.202	24.989	25.554	19.067	18.788	23.087		22.0344	4.21902					5	22.161	17.714	19.105	30.405	24.91	23.431	15.202	24.989	25.554	19.067	18.788	23.087	22.01	22.04	23.135	33.153	15.811	23.345	17.205	21.218	25.239	17.499		29.155		22.3575	4.59355
4	19.241	19.345	22.638	24.24	15.811	18.385	21.218	23.104	24.083	17.448	31.385	23.195		21.6744	4.11849					4	19.241	19.345	22.638	24.24	15.811	18.385	21.218	23.104	24.083	17.448	31.385	23.195	21.187	22.823	26.005	37.357	12.042	20	22.01	19.067	21.84	17.938	23.022	27.313		22.1124	5.10042
3	28.944	18.679	25.74	22.161	19.449	20.518	16.138	21.705	20.125	16.055	23.345	30.15		21.9174	4.5068					3	28.944	18.679	25.74	22.161	19.449	20.518	16.138	21.705	20.125	16.055	23.345	30.15	24.513	21.427	23.114	30.148	23.345	24.698	19.23	17.499	22.472	16.56	23.259	28.636		22.4129	4.20221
2	20.742	17.448	28.071	28.628	20.887	19.416	21.766	24.046	17.692	15.734	28.231	30.067		22.7273	4.96005					2	20.742	17.448	28.071	28.628	20.887	19.416	21.766	24.046	17.692	15.734	28.231	30.067	20.677	13.597	17.088	24.449	30.104	21.095	14.907	17.385	20.248	14.142	18.682	28.284		21.3911	5.20859
1	24.413	23.485	20.402	13.499	21.523	19.235	20.407	17.613	21.471	20.276	23.259	28		21.1319	3.62189					1	24.413	23.485	20.402	13.499	21.523	19.235	20.407	17.613	21.471	20.276	23.259	28	22.01	18.111	14.23	18.774	20.23	19.849	19.333	18.88	18.788	17.499	24.698	28.792		20.6157	3.62269
apop zone
1	22.01	18.111	14.23	18.774	20.23	19.849	19.333	18.88	18.788	17.499	24.698	28.792		20.0995	3.70693
2	20.677	13.597	17.088	24.449	30.104	21.095	14.907	17.385	20.248	14.142	18.682	28.284		20.0548	5.31294
3	24.513	21.427	23.114	30.148	23.345	24.698	19.23	17.499	22.472	16.56	23.259	28.636		22.9084	4.00942
4	21.187	22.823	26.005	37.357	12.042	20	22.01	19.067	21.84	17.938	23.022	27.313		22.5503	6.08384
5	22.01	22.04	23.135	33.153	15.811	23.345	17.205	21.218	25.239	17.499		29.155		22.71	5.15553
6	25.298	22.755	27.166	24.331	18.028	25.239	15.085	23.646	25	15.217		29.614		22.8526	4.74708
7	23.219	26.874	24.005	23.286	18.768		24.157	25.751	17.804	20.923		23.022		22.7809	2.8635
8	17.308	23.674	25.08	27.341	19.602		29.59	22.959	24.187	18.196		26.249		23.4186	4.00404
9	23.286	18.012	18.554	24.676	12.349		29.963		21.024	16.667		27		21.2812	5.51009
10	27.366		25.52		19.144		16.667			20.763				21.892	4.45123
11			18.927		11.102					20.309				16.7793	4.96503
12			17.464		17.678					19.067				18.0697	0.870319
	22.6024	21.2197	21.9513	25.8478	19.7213	21.7636	21.4858	22.6161	22.2226	18.3578	23.8376	26.5255

## Sheet: or749@16
	5a	5b	5c	5d	5e	5f	5g	5h	5i	5j		ave	std				5a	5b	5c	5d	5e	5f	5g	5h	5i	5j
12	16.465	14.56	20.699	16.643					19.105			17.4944	2.41137			12	16.465	14.56	20.699	16.643					19.105													17.4944	2.41137
11	16.971	16.68	11.411	22.804		18.439			16.279	20.809		17.6276	3.63705			11	16.971	16.68	11.411	22.804		18.439			16.279	20.809		17.951				15.734						17.4531	3.21685
10	15.202	17.036	15.348	19.067		15.202	20.055		16.125	19.235		17.1587	2.01284			10	15.202	17.036	15.348	19.067		15.202	20.055		16.125	19.235	22.41	10.77	16.667			18.679				15.217		17.001	2.92621
9	17.448	17.751	14.907	18.88		16.997	17.938	17.088	17.692	20.518		17.691	1.50521			9	17.448	17.751	14.907	18.88		16.997	17.938	17.088	17.692	20.518	18.974	16.398	18.342	15.846		16.68			9.434	18.974		17.1167	2.46089
8	14.621	16.125	16.465	15.041		15.846	11.411	17.464	19.416	11.333		15.3024	2.63035			8	14.621	16.125	16.465	15.041		15.846	11.411	17.464	19.416	11.333	11.87	16.997	19.437	14.174		12.944	16.465	14.126	14.56	18.135		15.3572	2.48749
7	17.951	12.806	20.011	18.487	19.686	13.132	12.875	16.031	17.117	19.195		16.7291	2.86744			7	17.951	12.806	20.011	18.487	19.686	13.132	12.875	16.031	17.117	19.195	17.036	14.621	19.414	17.889	16.028	13.283	7.601	16.014	17	13.679		15.9928	3.09351
6	14.981	19.437	16.111	16.826	18.785	13.283	10.088	17.889	17.117	16.014		16.0531	2.75729			6	14.981	19.437	16.111	16.826	18.785	13.283	10.088	17.889	17.117	16.014	12.824	14.802	13.132	17.714	12.737	14.907	11.175	18.595	24.515	19.195		16.0064	3.36942
5	16.506	13.333	18.679	13.132	12.293	15.804	13.728	17.117	19.105	14.174		15.3871	2.40786			5	16.506	13.333	18.679	13.132	12.293	15.804	13.728	17.117	19.105	14.174	13.149	15.62	11.47	17.448	14.981	17.308	10.154	15.463	18	12.257		14.9861	2.52866
4	10.77	16.055	18.679	22.201	15.846	16.398	12.454	17.72	14.422	14.016		15.8561	3.24755			4	10.77	16.055	18.679	22.201	15.846	16.398	12.454	17.72	14.422	14.016	8.667	13.098	11.643	19.09	17.308	15.563	11.813	14	21.587	13.744		15.2537	3.51276
3	10.75	16.014	14.682	13.132	12.824	14.907	10.75	18.028	18	14.391		14.3478	2.57711			3	10.75	16.014	14.682	13.132	12.824	14.907	10.75	18.028	18	14.391	12.684	9.843	17.385	15.463	18.135	15.563	13.728	13.149	18.682	14.063		14.6086	2.6001
2	10.198	12.875	13.92	14.174	14.063	10	13.728	13.342	13.038	17.651		13.2989	2.15015			2	10.198	12.875	13.92	14.174	14.063	10	13.728	13.342	13.038	17.651	12	18.667	12.684	15.691	20.044	15.202	18.962	18.439	21	16.465		15.1071	3.16026
1	10	14.016	13.098	14.621	13.132	13.149	20.055	13.744	14.142	22.351		14.8308	3.62496			1	10	14.016	13.098	14.621	13.132	13.149	20.055	13.744	14.142	22.351	14.907	15.506	10.687	14	16.667	20.838	18.523	18.856	22	12.944		15.6618	3.60573
apop zone
1	14.907	15.506	10.687	14	16.667	20.838	18.523	18.856	22	12.944		16.4928	3.57384
2	12	18.667	12.684	15.691	20.044	15.202	18.962	18.439	21	16.465		16.9154	3.0323
3	12.684	9.843	17.385	15.463	18.135	15.563	13.728	13.149	18.682	14.063		14.8695	2.73486
4	8.667	13.098	11.643	19.09	17.308	15.563	11.813	14	21.587	13.744		14.6513	3.83367
5	13.149	15.62	11.47	17.448	14.981	17.308	10.154	15.463	18	12.257		14.585	2.70989
6	12.824	14.802	13.132	17.714	12.737	14.907	11.175	18.595	24.515	19.195		15.9596	4.04473
7	17.036	14.621	19.414	17.889	16.028	13.283	7.601	16.014	17	13.679		15.2565	3.28268
8	11.87	16.997	19.437	14.174		12.944	16.465	14.126	14.56	18.135		15.412	2.49463
9	18.974	16.398	18.342	15.846		16.68			9.434	18.974		16.3783	3.31485
10	22.41	10.77	16.667			18.679				15.217		16.7486	4.2975
11		17.951				15.734						16.8425	1.56766
12

## Sheet: CSA_cyk4mut@16
	6a	6b	6c	6d	6e	6g	6h	6i	6j		ave	std				6a	6b	6c	6d	6e	6g	6h	6i	6j
12		25.08	17.464					14.252			18.932	5.56126			12		25.08	17.464					14.252												18.932	5.56126
11	19.698	17.088	13.601					12.019			15.6015	3.45578			11	19.698	17.088	13.601					12.019												15.6015	3.45578
10	20.616	20.616	18.439	18.714		17.464	11.18	11.813			16.9774	3.91894			10	20.616	20.616	18.439	18.714		17.464	11.18	11.813				14.422								16.658	3.73903
9	19.209	20.125	17	18.962		21.592	10.296	9.911			16.7279	4.7304			9	19.209	20.125	17	18.962		21.592	10.296	9.911		17.493	11.705	18.248	16.221		13.132		15.734			16.1252	3.78417
8	18.028	21.84	17.493	16.055	21.471	18.774	9	14.636			17.1621	4.10807			8	18.028	21.84	17.493	16.055	21.471	18.774	9	14.636		12.207	16.279	13.928	8.667		16.465	19.105	12.454			15.7601	3.99139
7	16.279	21.095	10.296	17.385	20.025	13.744	11.045	10.541			15.0512	4.29173			7	16.279	21.095	10.296	17.385	20.025	13.744	11.045	10.541		19.849	19.698	20.025	13.92	15.297	15.202	11.662	10.853	20.518		15.7314	3.95899
6	10.296	17.889	9.055	16.138	27.459	13.283	13	13.35			15.0587	5.75676			6	10.296	17.889	9.055	16.138	27.459	13.283	13	13.35		15.556	21.26	11.045	12.737	18.248	15.391	12.042	14.422	24.042		15.6008	4.92238
5	15.033	13.601	19.105	18.111	16.553	13.597	12.369	14.142	17.889		15.6	2.38832			5	15.033	13.601	19.105	18.111	16.553	13.597	12.369	14.142	17.889	17.72	20.125	13	15.734	19.313	14.252	14.318	13.872	19.698		16.024	2.55724
4	15.652	17.464	20.881	13.482	17.804	15.217	17.72	10.349	19.925		16.4993	3.24712			4	15.652	17.464	20.881	13.482	17.804	15.217	17.72	10.349	19.925	13.928	15.556	16.553	13.333	19.209	12.166	20.518	11.314	16.553		15.9791	3.12645
3	14.213	13.454	17.029	12.824	29.069	12	11.705	9.262	24.515		16.0079	6.55718			3	14.213	13.454	17.029	12.824	29.069	12	11.705	9.262	24.515	13.038	13.601	13	13.132	13	18.196	16.279	10.853	9.22		14.6883	5.03586
2	12.207	14.866	14.56	14.621	13.892	14.252	14	11.662	17.117		14.1308	1.57191			2	12.207	14.866	14.56	14.621	13.892	14.252	14	11.662	17.117	13.038	13.892	13	14.667	23.707	12.684	9.055	13.872	9.22		13.9062	3.11939
1	9.22	12.042	15.652	14.314	17.205	12.944	19.849	6.146	12.042		13.2682	4.12019			1	9.22	12.042	15.652	14.314	17.205	12.944	19.849	6.146	12.042	10.198	13	13	15.391	17.029	10.934	11.045	13.233	17.088		13.3518	3.3333
apop zone
1	10.198	13	13	15.391	17.029	10.934	11.045	13.233	17.088		13.4353	2.57273
2	13.038	13.892	13	14.667	23.707	12.684	9.055	13.872	9.22		13.6817	4.25361
3	13.038	13.601	13	13.132	13	18.196	16.279	10.853	9.22		13.3688	2.64113
4	13.928	15.556	16.553	13.333	19.209	12.166	20.518	11.314	16.553		15.4589	3.10137
5	17.72	20.125	13	15.734	19.313	14.252	14.318	13.872	19.698		16.448	2.79067
6	15.556	21.26	11.045	12.737	18.248	15.391	12.042	14.422	24.042		16.0826	4.34823
7	19.849	19.698	20.025	13.92	15.297	15.202	11.662	10.853	20.518		16.336	3.78903
8	12.207	16.279	13.928	8.667		16.465	19.105	12.454			14.1579	3.44499
9	17.493	11.705	18.248	16.221		13.132		15.734			15.4222	2.53264
10			14.422								14.422	#DIV/0!
11											#DIV/0!	#DIV/0!
12

## Sheet: CSA_cyk4mut@25
	3a	3b	3c	3d	3e	3f	3g	3h	3i	3j							3a	3b	3c	3d	3e	3f	3g	3h	3i	3j
12	16.125											16.125	#DIV/0!			12	16.125																			16.68		16.4025	0.392444
11	15.846											15.846	#DIV/0!			11	15.846										14.981				27.586					14.907		18.33	6.18537
10	18.535	19.925	16.155	18.571		24.187			17			19.0622	2.83661			10	18.535	19.925	16.155	18.571		24.187			17		20.177	16.125			26.077					10.198		18.695	4.42888
9	14.907	20.1	17.804	13.499	24.166	25	17.029	19.647	15.133	20.537		18.7822	3.85122			9	14.907	20.1	17.804	13.499	24.166	25	17.029	19.647	15.133	20.537	19.379	18.028	24.698	13.35	18.358		19	19.647		8.894		18.2876	4.15342
8	13.499	16.971	16.279	19.379	22.672	21	15.811	20.616	21.024	13.499		18.075	3.29969			8	13.499	16.971	16.279	19.379	22.672	21	15.811	20.616	21.024	13.499	18.049	20.248	24.759	17.789	25.807	21.024	14.56	23.022	20.396	13.597		19	3.70707
7	17.295	17.205	13.928	18.856	22.361	20.616	14.422	18.974	16.279	19.09		17.9026	2.62701			7	17.295	17.205	13.928	18.856	22.361	20.616	14.422	18.974	16.279	19.09	16.707	16.155	24.083	14.063	21.932	22.136	13.454	15	19.313	16.028		17.8948	3.14064
6	12.401	19.105	19.647	14.063	30.887	21.024	15.232	18	23.087	17.499		19.0945	5.24736			6	12.401	19.105	19.647	14.063	30.887	21.024	15.232	18	23.087	17.499	16.56	16.553	19.105	21.592	15.264	15.133	15.524	16.125	19.235	17.14		18.1588	4.00785
5	15.804	19.313	17.205	17.088	26.42	20	12.207	25.08	32.14	11.333		19.659	6.52736			5	15.804	19.313	17.205	17.088	26.42	20	12.207	25.08	32.14	11.333	16.398	16.279	17.804	18.774	27.857	14.318	12.042	21.378	19.647	11.392		18.6239	5.68175
4	11.035	17.088	13.416	17.913	23.087	26	12.53	18.028	21	10.541		17.0638	5.2285			4	11.035	17.088	13.416	17.913	23.087	26	12.53	18.028	21	10.541	11.333	16.492	22.825	16.667	20.518	15.652	10	14.318	24.042	16.014		16.9249	4.77563
3	12.649	24.739	18.111	16.707	23.324	22.023	14.213	12.042	21.84	18.439		18.4087	4.51378			3	12.649	24.739	18.111	16.707	23.324	22.023	14.213	12.042	21.84	18.439	17.889	21.932	18.868	12.667	22.204	15.297	8.544	18.248	23.345	8.894		17.5988	4.87977
2	16.111	13.601	20.518	11.47	20.025	22.472	15.264	13.892	18	14.063		16.5416	3.56826			2	16.111	13.601	20.518	11.47	20.025	22.472	15.264	13.892	18	14.063	16.125	21.471	16.401	14.621	22.204	19.026	15.232	13.416	25.08	18.679		17.3835	3.66913
1	10.435	15.297	16.155	11.333	20.248	20	13.416	18.028	14.422	18.209		15.7543	3.41353			1	10.435	15.297	16.155	11.333	20.248	20	13.416	18.028	14.422	18.209	19.414	19.026	17.088	16.398	28.443	19.026	7.81	15.811	18.974	17.537		16.8535	4.32473
1	19.414	19.026	17.088	16.398	28.443	19.026	7.81	15.811	18.974	17.537		17.9527	5.01473
2	16.125	21.471	16.401	14.621	22.204	19.026	15.232	13.416	25.08	18.679		18.2255	3.75674
3	17.889	21.932	18.868	12.667	22.204	15.297	8.544	18.248	23.345	8.894		16.7888	5.33274
4	11.333	16.492	22.825	16.667	20.518	15.652	10	14.318	24.042	16.014		16.7861	4.55711
5	16.398	16.279	17.804	18.774	27.857	14.318	12.042	21.378	19.647	11.392		17.5889	4.81295
6	16.56	16.553	19.105	21.592	15.264	15.133	15.524	16.125	19.235	17.14		17.2231	2.1048
7	16.707	16.155	24.083	14.063	21.932	22.136	13.454	15	19.313	16.028		17.8871	3.73121
8	18.049	20.248	24.759	17.789	25.807	21.024	14.56	23.022	20.396	13.597		19.9251	4.02768
9	19.379	18.028	24.698	13.35	18.358		19	19.647		8.894		17.6693	4.69457
10	20.177	16.125			26.077					10.198		18.1442	6.69031
11	14.981				27.586					14.907		19.158	7.29896
12										16.68		16.68	#DIV/0!

## Sheet: OD95@16
	4a	4b	4c	4d	4e	4f	4h	4i		ave	stdev			4a	4b	4c	4d	4e	4f	4h	4i
12			20							20	#DIV/0!		12			20															20	#DIV/0!
11	12.667		11.87			20.58				15.039	4.81516		11	12.667		11.87			20.58						18.868						15.9962	4.37293
10	16.72		16.055			19.379				17.3847	1.75886		10	16.72		16.055			19.379					16.879	21.499			18.196			18.1213	2.03827
9	14.391		15.506		13.149	12.019	16.028			14.2186	1.65404		9	14.391		15.506		13.149	12.019	16.028		14.802		19.799	17.751			12.667			15.1236	2.49848
8	14.56	16.465	15.606	17.075	14.174	13.132	14.126	12.806		14.743	1.52285		8	14.56	16.465	15.606	17.075	14.174	13.132	14.126	12.806	14.422		22.94	18.135	14.621	18.868	12.074			15.6431	2.88022
7	11.643	18.391	14.422	18.88	15.549	12.824	9.262	9.545		13.8145	3.67679		7	11.643	18.391	14.422	18.88	15.549	12.824	9.262	9.545	13.482		16.997	14.682	11.47	14.063	10.022	16.465		13.8465	3.07727
6	12.257	16.275	12.257	12.257	18.439	13.333	15.463	13.728		14.2511	2.27248		6	12.257	16.275	12.257	12.257	18.439	13.333	15.463	13.728	14.016	15.62	18.342	17.913	12.667	10.853	10	15.549		14.3106	2.60742
5	11.392	17.346	14.981	16.72	13.872	9.545	13.098	12.019		13.6216	2.66764		5	11.392	17.346	14.981	16.72	13.872	9.545	13.098	12.019	11.035	12.579	17.951	20.934	14.667	10.77	10.176	16.234		13.9574	3.22411
4	13.098	11.175	15.734	16.275	13.597	14.126	14.267	11.035		13.6634	1.89401		4	13.098	11.175	15.734	16.275	13.597	14.126	14.267	11.035	8.485	14.267	17.308	14.126	14	10.541	16.707	18.342		13.9427	2.65274
3	14.016	14.063	13.333	14.016	12.238	11.314	12.019	13.92		13.1149	1.09752		3	14.016	14.063	13.333	14.016	12.238	11.314	12.019	13.92	6.864	15.391	11.87	16.055	12.806	13.872	14.621	12.737		13.0709	2.09649
2	11.411	15.549	15.563	16.398	14.56	17.951	17.537	16.506		15.6844	2.04636		2	11.411	15.549	15.563	16.398	14.56	17.951	17.537	16.506	10.154	13.744	7.601	17.346	11.096	11.096	11.508	15.202		13.9514	3.09294
1	9.286	13.132	12.737	17.346	13.416	12.944	17.537	11.662		13.5075	2.75832		1	9.286	13.132	12.737	17.346	13.416	12.944	17.537	11.662	8	12.737	12.166	13.098	15.391	13.597	17.346	10.414		13.1756	2.73555
1	8	12.737	12.166	13.098	15.391	13.597	17.346	10.414		12.8436	2.85925
2	10.154	13.744	7.601	17.346	11.096	11.096	11.508	15.202		12.2184	3.07357
3	6.864	15.391	11.87	16.055	12.806	13.872	14.621	12.737		13.027	2.86522
4	8.485	14.267	17.308	14.126	14	10.541	16.707	18.342		14.222	3.3636																				4	#DIV/0!
5	11.035	12.579	17.951	20.934	14.667	10.77	10.176	16.234		14.2933	3.86014																				3.19925	0.874586
6	14.016	15.62	18.342	17.913	12.667	10.853	10	15.549		14.37	3.06533																				3.62427	0.407655
7	13.482		16.997	14.682	11.47	14.063	10.022	16.465		13.883	2.51413																				3.02471	0.499697
8	14.422		22.94	18.135	14.621	18.868	12.074			16.8433	3.91114																				3.12863	0.576044
9	14.802		19.799	17.751			12.667			16.2548	3.15081																				2.76929	0.615454
10			16.879	21.499			18.196			18.858	2.38008																				2.86211	0.521484
11				18.868						18.868	#DIV/0!																				2.79149	0.644822
12													12																		2.78854	0.530548
																															2.61419	0.419298
																															2.79028	0.618587
																															2.63511	0.54711

## Sheet: OD95@25
	1a	1b	1c	1d	1e	1f	1g	1h	1i	1j	1a	1b	1c	1d	1e	1f	1g	1h	1i	1j
12							22.676		16.325									18.774				19.2583	3.20308
11		21.218				20.71	23.113	21.929	17.414		19.437						23.257	19.889	17.029			20.444	2.23821
10		18.196				19.379	16.465	25.76	15.811		17.938						20.276	19.414	17.328			18.9519	2.93227
9	22.559	19.333	17.601		18.196	20.881	16.465	23.935	19.105	15.846	19.978					19.333	19.23	17.789	15			18.9465	2.45271
8	21.52	19.619	21.633	19.09	17.537	17.308	19.821	20.1	15.305	18.439	14.907	19.414	21.187		18.679	20.838	17.205	18.962	15.62	14		18.4834	2.28879
7	17.385	19.607	20.934	16.865	18.306	18.306	19.799	20.011	15.62	17.938	18.821	18.962	19.23	19.333	18.714	20.667	22.191	17.613	18.795	17.537		18.8317	1.50842
6	22.91	15.563	23.333	18.012	11.353	20.055	21.082	20.243	17.103	21.715	17.938	23.898	18.868	18.856	18.049	26.034	20.934	17.951	12.971	17.789		19.2328	3.55706
5	20.352	13.233	22.191	18.209	19.379	23.017	16.055	20.881	16.8	17.308	21.218	20.934	18.821	15.563	15.391	22.01	19.09	16.344	16.008	18.306		18.5555	2.68742
4	18.012	12.293	18.667	18.714	17.036	21.344	22.161	16.667	17.241	19.743	20	19.889	19.379	17.499	18.135	23.371	26.642	19.607	14.422	17.601		18.9212	3.07952
3	15.902	17.938	18.306	14.126	15.463	21.592	16.56	17.789	17.393	20.396	16.826	15.202	21.766	18.535	15.232	20.276	20.352	20.699	13.865	18.439		17.8329	2.44023
2	14.907	15.348	19.23	14.56	13.482	19.379	14.981	14.063	19.449	19.414	16.028	16.398	16.997	15.846	14.802	20.243	24.166	15.846	14.807	17.308		16.8627	2.67343
1	12.526	16.125	18.868	16.014	16.055	12.737	16.125	17.088	11.885	19.889	10.75	15.463	16.667	15.606	16.997	19.414	17.951	17.789	17.529	20.881		16.3179	2.67999
1	10.75	15.463	16.667	15.606	16.997	19.414	17.951	17.789	17.529	20.881
2	16.028	16.398	16.997	15.846	14.802	20.243	24.166	15.846	14.807	17.308
3	16.826	15.202	21.766	18.535	15.232	20.276	20.352	20.699	13.865	18.439
4	20	19.889	19.379	17.499	18.135	23.371	26.642	19.607	14.422	17.601
5	21.218	20.934	18.821	15.563	15.391	22.01	19.09	16.344	16.008	18.306
6	17.938	23.898	18.868	18.856	18.049	26.034	20.934	17.951	12.971	17.789
7	18.821	18.962	19.23	19.333	18.714	20.667	22.191	17.613	18.795	17.537
8	14.907	19.414	21.187		18.679	20.838	17.205	18.962	15.62	14
9	19.978					19.333	19.23	17.789	15
10	17.938						20.276	19.414	17.328
11	19.437						23.257	19.889	17.029
12								18.774
