# Supplementary material for: CYK-4 functions independently of its centralspindlin partner ZEN-4 to cellularize oocytes in germline syncytia
Source: eLife. 2018 Jul 10;7:e36919. doi: 10.7554/eLife.36919 (PMC6056237; doi:10.7554/eLife.36919)
Supplement: Figure 5—figure supplement 1—source data 1. [file elife-36919-fig5-figsupp1-data1.xlsx]

## Sheet: Sheet1
% Embryonic Viability
	No RNAi			cyk-4(RNAi)
	Control (N2)			None (N2)			WT			∆C1			R459A			AAE (R459A/K495A/R499E)			L374A			GG (C380G/C383G)
	Total emb.	Hatched	% Viability	Total emb.	Hatched	% Viability	Total emb.	Hatched	% Viability	Total emb.	Hatched	% Viability	Total emb.	Hatched	% Viability	Total emb.	Hatched	% Viability	Total emb.	Hatched	% Viability	Total emb.	Hatched	% Viability
Plate 1	161	160	99.3789	18	0	0	144	144	100	33	0	0	21	2	9.52381	29	5	17.2414	32	0	0	19	0	0
Plate 2	156	155	99.359	51	0	0	151	151	100	23	0	0	22	2	9.09091	24	12	50	28	3	10.7143	44	0	0
Plate 3	166	165	99.3976	30	0	0	130	130	100	26	0	0	29	4	13.7931	23	5	21.7391	29	0	0	27	0	0
Plate 4	180	179	99.4444	57	0	0	130	130	100	34	0	0	23	6	26.087	37	10	27.027	41	1	2.43902	23	0	0
Plate 5	164	160	97.561	73	0	0	136	136	100	23	0	0	23	3	13.0435	31	6	19.3548	25	0	0	26	0	0
Plate 6	158	155	98.1013	33	0	0	132	132	100	22	0	0	17	3	17.6471	15	2	13.3333	28	1	3.57143	16	0	0
Plate 7	173	172	99.422	41	0	0	170	170	100	25	0	0	27	3	11.1111	18	6	33.3333	38	0	0	20	0	0
Plate 8	170	167	98.2353	45	0	0	146	146	100	22	0	0	22	2	9.09091	16	2	12.5	36	1	2.77778	24	0	0
Plate 9	167	167	100	32	0	0	160	159	99.375	20	0	0	26	1	3.84615	28	5	17.8571	24	0	0	40	0	0
Plate 10	173	170	98.2659	26	0	0	146	146	100	31	0	0	23	3	13.0435	32	8	25	35	0	0	17	0	0
Plate 11	138	137	99.2754	32	0	0	115	115	100	36	0	0	33	2	6.06061	27	10	37.037	23	0	0	27	0	0
Plate 12	161	160	99.3789	23	0	0	102	102	100	16	0	0	24	10	41.6667	26	12	46.1538	34	1	2.94118	22	0	0
Plate 13	154	148	96.1039	39	0	0	141	141	100	35	0	0	27	1	3.7037	17	5	29.4118	32	0	0	15	0	0
Plate 14	168	167	99.4048	26	0	0	150	150	100	21	0	0	21	2	9.52381	32	16	50	22	0	0	14	0	0
Plate 15	161	159	98.7578	39	0	0	113	113	100	16	0	0	35	9	25.7143	23	7	30.4348
Mean			98.8057			0			99.9583			0			14.1964			28.6949			1.60312			0
SD			1.00255			0			0.161374			0			10.1141			12.5534			2.95981			0
n	2450			565			2066			383			373			378			427			334
	No RNAi	cyk-4(RNAi)
	Control (N2)	None (N2)	WT	∆C1	R459A	AAE	L374A	GG
