# Supplementary material for: CYK-4 functions independently of its centralspindlin partner ZEN-4 to cellularize oocytes in germline syncytia
Source: eLife. 2018 Jul 10;7:e36919. doi: 10.7554/eLife.36919 (PMC6056237; doi:10.7554/eLife.36919)
Supplement: Figure 5—figure supplement 1—source data 2. [file elife-36919-fig5-figsupp1-data2.xlsx]

## Sheet: Sheet1
% Embryonic Viability
	No RNAi			cyk-4(RNAi)
	N2			N2			WT
	Total emb.	Hatched	% Viability	Total emb.	Hatched	% Viability	Total emb.	Hatched	% Viability
Plate 1	177	177	100	13	0	0	131	131	100
Plate 2	66	66	100	18	0	0	133	111	83.4586
Plate 3	176	176	100	30	0	0	112	111	99.1071
Plate 4	158	158	100	21	0	0	121	121	100
Plate 5	61	61	100	23	0	0	147	147	100
Plate 6	167	166	99.4012	24	0	0	114	111	97.3684
Plate 7	160	160	100	16	0	0	33	28	84.8485
Plate 8	169	168	99.4083	14	0	0	40	34	85
Plate 9	163	160	98.1595	17	0	0	63	58	92.0635
Plate 10	51	51	100	27	0	0	84	82	97.619
Plate 11				12	0	0
Plate 12				30	0	0
Mean			99.6969			0			93.9465
SD			0.594175			0			6.97709
n	1348			245			978
	No RNAi	cyk-4(RNAi)
	N2	N2	WT
