# Supplementary material for: CYK-4 functions independently of its centralspindlin partner ZEN-4 to cellularize oocytes in germline syncytia
Source: eLife. 2018 Jul 10;7:e36919. doi: 10.7554/eLife.36919 (PMC6056237; doi:10.7554/eLife.36919)
Supplement: Figure 5—source data 1. [file elife-36919-fig5-data1.xlsx]

## Sheet: Sheet1
Number of embryos
	No RNAi	cyk-4(RNAi)
	Control (N2)	None (N2)	WT	∆C1	R459A	AAE
Plate 1	161	18	144	33	21	29
Plate 2	156	51	151	23	22	24
Plate 3	166	30	130	26	29	23
Plate 4	180	57	130	34	23	37
Plate 5	164	73	136	23	23	31
Plate 6	158	33	132	22	17	15
Plate 7	173	41	170	25	27	18
Plate 8	170	45	146	22	22	16
Plate 9	167	32	160	20	26	28
Plate 10	173	26	146	31	23	32
Plate 11	138	32	115	36	33	27
Plate 12	161	23	102	16	24	26
Plate 13	154	39	141	35	27	17
Plate 14	168	26	150	21	21	32
Plate 15	161	39	113	16	35	23
Mean	163.333	37.6667	137.733	25.5333	24.8667	25.2
SD	9.92592	14.361	18.1481	6.69613	4.74893	6.60303
