# Supplementary material for: CYK-4 functions independently of its centralspindlin partner ZEN-4 to cellularize oocytes in germline syncytia
Source: eLife. 2018 Jul 10;7:e36919. doi: 10.7554/eLife.36919 (PMC6056237; doi:10.7554/eLife.36919)
Supplement: Figure 6—figure supplement 2—source data 2. [file elife-36919-fig6-figsupp2-data2.xlsx]

## Sheet: Sheet1
Inject N2 worms with indicated dsRNA(s), then count embryos laid 24–48 hours after dsRNA injection
hyls-1 dsRNA serves as control for second dsRNA in double RNAi conditions
Strain:	No transgene (N2)		WT cyk-4 transgene			R459A cyk-4 transgene			AAE cyk-4 transgene
RNAi:	hyls-1	cyk-4 + hyls-1	cyk-4 + hyls-1	cyk-4 + ced-10	cyk-4 + cdc-42	cyk-4 + hyls-1	cyk-4 + ced-10	cyk-4 + cdc-42	cyk-4 + hyls-1	cyk-4 + ced-10	cyk-4 + cdc-42
Plate 1	148	46	187	93	115	20	36	26	49	42	53
Plate 2	152	54	112	116	110	20	22	24	49	32	38
Plate 3	192	55	100	118	110	13	25	49	36	59	28
Plate 4	188	27	119	111	94	29	57	27	31	45	28
Plate 5	172	107	136	125	98	38	28	38	45	21	34
Plate 6	177	55	117	110	132	10	30	43	17	63	49
Plate 7	202	29	107	127	92	32	52	30	36	75	42
Plate 8	177	79	116	71	108	33	36	22	30	59	70
Plate 9		80	145	127	94
Plate 10		34	129	139	141
Plate 11		71	103	141	119
Plate 12		45	99	122	139
Mean	176	56.8333	122.5	116.667	112.667	24.375	35.75	32.375	36.625	49.5	42.75
SD	18.7236	23.748	24.7992	19.3688	17.296	10.0986	12.6124	9.81162	10.9406	17.7603	14.2503
