# Supplementary material for: CYK-4 functions independently of its centralspindlin partner ZEN-4 to cellularize oocytes in germline syncytia
Source: eLife. 2018 Jul 10;7:e36919. doi: 10.7554/eLife.36919 (PMC6056237; doi:10.7554/eLife.36919)
Supplement: Figure 6—source data 1. [file elife-36919-fig6-data1.xlsx]

## Sheet: Sheet1
Inject N2 worms with indicated dsRNA(s), then count embryos laid 24–48 hours after injection
hyls-1 dsRNA serves as control for second dsRNA in double RNAi conditions
RNAi:	hyls-1	cyk-4 + hyls-1	rho-1 + hyls-1	ced-10 + hyls-1	cdc-42 + hyls-1	ced-10 + cdc-42
Plate 1	148	46	80	165	162	140
Plate 2	152	54	72	183	171	139
Plate 3	192	55	80	151	159	173
Plate 4	188	27	85	164	143	180
Plate 5	172	107	69	103	156	176
Plate 6	177	55	57	188	120	161
Plate 7	202	29	102	170	168	186
Plate 8	177	79	117	177	151	182
Plate 9	150	80
Plate 10	168	34
Plate 11	152	71
Plate 12	147	45
Mean	168.75	56.8333	82.75	162.625	153.75	167.125
SD	19.0221	23.748	19.0169	26.7739	16.3161	18.5968
