# Supplementary material for: CYK-4 functions independently of its centralspindlin partner ZEN-4 to cellularize oocytes in germline syncytia
Source: eLife. 2018 Jul 10;7:e36919. doi: 10.7554/eLife.36919 (PMC6056237; doi:10.7554/eLife.36919)
Supplement: Figure 7—source data 1. [file elife-36919-fig7-data1.xlsx]

## Sheet: Sheet1
Embryos laid 48–72 hours after dsRNA injection
hyls-1 dsRNA serves as control for second dsRNA in double RNAi conditions
RNAi:	Uninjected		rga-3/4 + hyls-1		cyk-4 + hyls-1		cyk-4 + rga-3/4
cyk-4 transgene:	WT	R459A	WT	R459A	WT	R459A	WT	R459A
Plate 1	69	121	50	49	76	8	103	5
Plate 2	106	110	87	106	101	11	133	6
Plate 3	132	70	48	97	137	4	94	9
Plate 4	70	121	38	116	138	0	43	9
Plate 5	120	44	54	85	126	7	94	19
Plate 6	142	88	80	25	91	6	115	18
Plate 7	30	36	46	99	122	13	114	9
Plate 8	51	48	117	36	42	3		2
Plate 9	63	75		42	109	3		6
Plate 10	72	58			141			7
Mean	85.5	77.1	65	72.7778	108.3	6.11111	99.4286	9
SD	37.173	31.81	27.0924	34.539	31.7422	4.13656	28.3952	5.4569
